# Supplementary material for: Lorentz-violating type-II Dirac fermions in transition metal dichalcogenide PtTe2
Source: PubMed Central journal article supplement (PMC5557853; doi:10.1038/s41467-017-00280-6), 2017-08-15
Supplement: 41467_2017_280_MOESM1_ESM.pdf [file 41467_2017_280_MOESM1_ESM.pdf]

File name: Supplementary Information  
Description: Supplementary Figures

File name: Peer Review File  
Description:

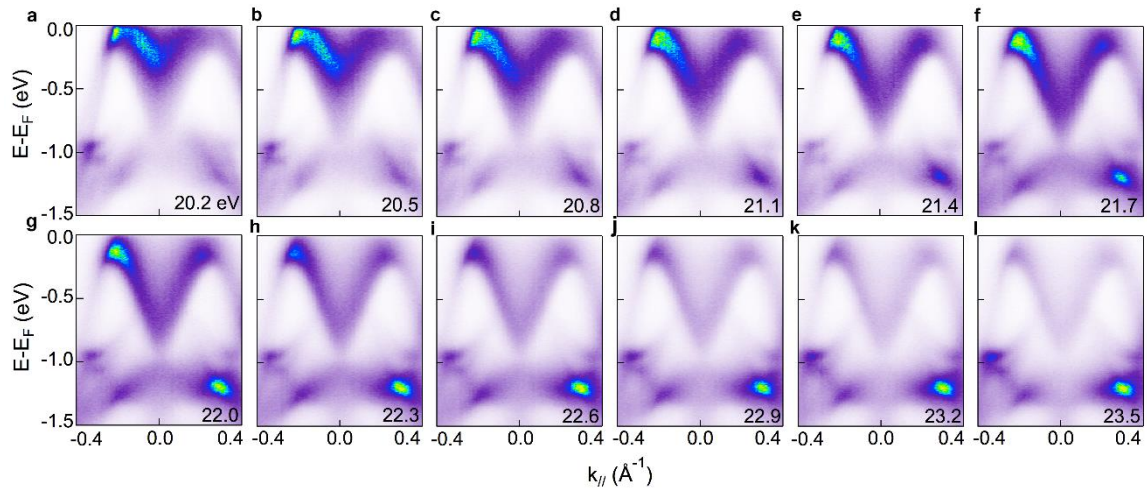

**Supplementary Figure 1: Evolution of the dispersion along  $\Gamma$ -M with a finite  $k_z$  (photon energy) step. (a-l)** Dispersions along  $\Gamma$ -M high symmetry direction at different  $k_z$  values from  $0.28$  to  $0.41 \times 2\pi/c$  with a fine photon energy step of  $0.3$  eV.

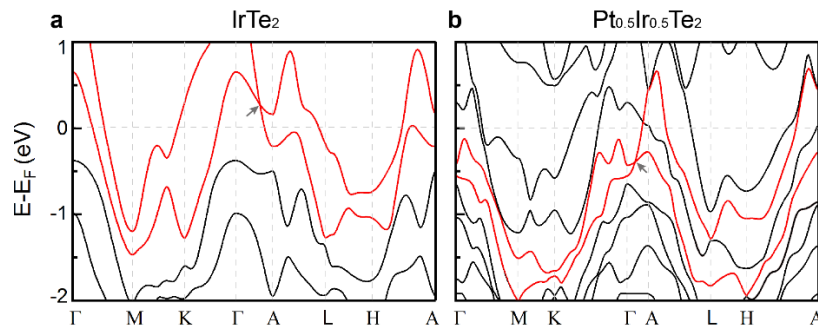

**Supplementary Figure 2: Doping  $\text{PtTe}_2$  with Ir to shift the Dirac node to the Fermi energy. (a)** Calculated band dispersion of  $\text{IrTe}_2$  along high symmetry directions, resolving the tilted Dirac node above the Fermi level. **(b)** Calculated band dispersion of  $\text{Ir}_{0.5}\text{Pt}_{0.5}\text{Te}_2$  along high symmetry directions.
